# Supplementary material for: Understanding the binding interaction of imidazole with ZnO nanomaterials and clusters
Source: Royal Society of Chemistry journal article supplement (doi:10.1039/c4ra15957h), 2014-12-22
Supplement: c4ra15957h2.pdf [file c4ra15957h2.pdf]

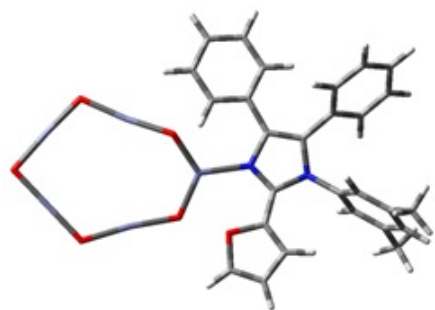

**Imidazole-Zn<sub>5</sub>O<sub>5</sub>**

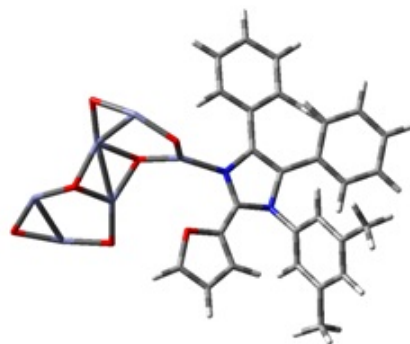

**Imidazole-Zn<sub>6</sub>O<sub>6</sub> (C)**

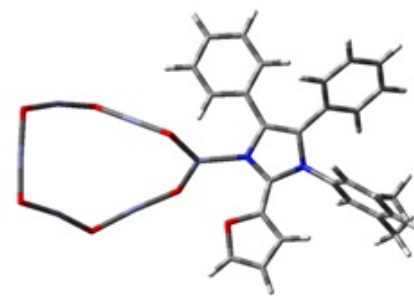

**Imidazole-Zn<sub>6</sub>O<sub>6</sub>**

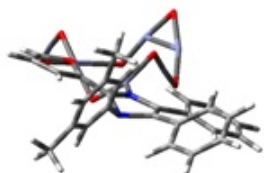

**Imidazole-Zn<sub>7</sub>O<sub>7</sub>**

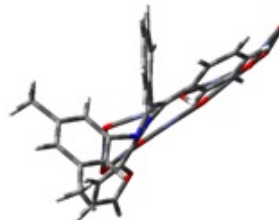

**Imidazole-Zn<sub>8</sub>O<sub>8</sub>**

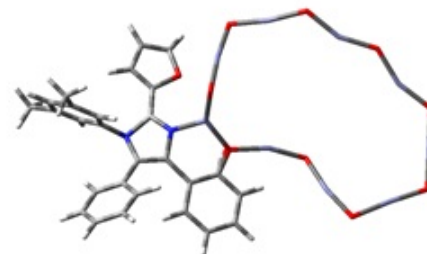

**Imidazole-Zn<sub>9</sub>O<sub>9</sub>**

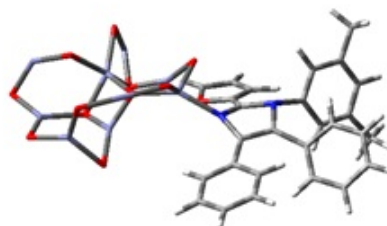

**Imidazole-Zn<sub>10</sub>O<sub>10</sub>**

**Figure S1b**
