# Supplementary material for: Understanding the binding interaction of imidazole with ZnO nanomaterials and clusters
Source: Royal Society of Chemistry journal article supplement (doi:10.1039/c4ra15957h), 2014-12-22
Supplement: c4ra15957h7.pdf [file c4ra15957h7.pdf]

## **Understanding the binding interaction of imidazole with ZnO nanomaterials and clusters**

**Jayaraman Jayabharathi\***, **Munusamy Sundharesan**, **Annadurai Prabhakaran**,  
**Chockalingam Karunakaran**

*Department of Chemistry, Annamalai University, Annamalainagar 608 002, Tamilnadu, India.*

\* Address for correspondence

Dr. J. Jayabharathi  
Professor of Chemistry  
Department of Chemistry  
Annamalai University  
Annamalainagar 608 002  
Tamilnadu, India.  
Tel: +91 9443940735  
E-mail: jtchalam2005@yahoo.co.in

---

\* Corresponding author. Tel.: +91 9443940735  
*E-mail address:* jtchalam2005@yahoo.co.in

**Table S1.** Mulliken atomic charges of imidazole and imidazole–Zn<sub>n</sub>O<sub>n</sub> clusters (n = 1-4)

| S. No. | Imidazole |                | Imidazole-Zn <sub>2</sub> O <sub>2</sub> |                | Imidazole-Zn <sub>3</sub> O <sub>3</sub> |                | Imidazole-Zn <sub>4</sub> O <sub>4</sub> (R) |                | Imidazole-Zn <sub>4</sub> O <sub>4</sub> (W) |                |
|--------|-----------|----------------|------------------------------------------|----------------|------------------------------------------|----------------|----------------------------------------------|----------------|----------------------------------------------|----------------|
|        | Atoms     | Atomic charges | Atoms                                    | Atomic charges | Atoms                                    | Atomic charges | Atoms                                        | Atomic charges | Atoms                                        | Atomic charges |
| 1      | C         | -0.057107      | C                                        | 0.007123       | C                                        | 0.086970       | C                                            | 0.023717       | C                                            | 0.026088       |
| 2      | C         | -0.029555      | C                                        | -0.056496      | C                                        | -0.097122      | C                                            | -0.618156      | C                                            | -0.109449      |
| 3      | C         | 0.048013       | C                                        | 0.134347       | C                                        | 0.162095       | C                                            | -0.022226      | C                                            | 0.086707       |
| 4      | C         | -0.005005      | C                                        | 0.002228       | C                                        | 0.069403       | C                                            | -0.046402      | C                                            | -0.077401      |
| 5      | C         | -0.120660      | C                                        | -0.487496      | C                                        | -0.614764      | C                                            | -0.106073      | C                                            | -0.297884      |
| 6      | C         | -0.099602      | C                                        | -0.078886      | C                                        | -0.053578      | C                                            | -0.077795      | C                                            | -0.060070      |
| 7      | C         | -0.136034      | C                                        | -0.105115      | C                                        | -0.124518      | C                                            | -0.140304      | C                                            | -0.097378      |
| 8      | H         | 0.135708       | H                                        | 0.455771       | H                                        | 0.398768       | H                                            | 0.133375       | H                                            | 0.343947       |
| 9      | C         | -0.136127      | C                                        | -0.081080      | C                                        | -0.154350      | C                                            | -0.121525      | C                                            | -0.101037      |
| 10     | H         | 0.156103       | H                                        | 0.185200       | C                                        | -0.075124      | H                                            | 0.194032       | H                                            | 0.177666       |
| 11     | C         | -0.127497      | C                                        | -0.132400      | H                                        | 0.106447       | C                                            | -0.111615      | C                                            | -0.128083      |
| 12     | H         | 0.127732       | H                                        | 0.129447       | H                                        | 0.126442       | H                                            | 0.131678       | H                                            | 0.104038       |
| 13     | H         | 0.129724       | H                                        | 0.156542       | H                                        | 0.113865       | H                                            | 0.145102       | H                                            | 0.138479       |
| 14     | H         | 0.127934       | H                                        | 0.133485       | C                                        | 0.121308       | H                                            | 0.134135       | H                                            | 0.130123       |
| 15     | C         | -0.023749      | C                                        | 0.013090       | C                                        | -0.325636      | C                                            | -0.036650      | C                                            | -0.052737      |
| 16     | C         | -0.105187      | C                                        | -0.484446      | C                                        | -0.096333      | C                                            | -0.102543      | C                                            | -0.296394      |
| 17     | C         | -0.105386      | C                                        | -0.128517      | C                                        | -0.203044      | C                                            | -0.100102      | C                                            | -0.124185      |
| 18     | C         | -0.134155      | C                                        | -0.097901      | H                                        | 0.357177       | C                                            | -0.131121      | C                                            | -0.138256      |
| 19     | H         | 0.143437       | H                                        | 0.461469       | C                                        | -0.117298      | H                                            | 0.144195       | H                                            | 0.348939       |
| 20     | C         | -0.132856      | H                                        | 0.142987       | H                                        | 0.155028       | C                                            | -0.131446      | C                                            | -0.099747      |
| 21     | H         | 0.137291       | C                                        | -0.131777      | C                                        | -0.093583      | H                                            | 0.137175       | H                                            | 0.145792       |
| 22     | C         | -0.120219      | H                                        | 0.134682       | H                                        | 0.175262       | C                                            | -0.111864      | C                                            | -0.127837      |

---

|    |   |           |   |           |   |           |   |           |   |           |
|----|---|-----------|---|-----------|---|-----------|---|-----------|---|-----------|
| 23 | H | 0.134470  | H | 0.133298  | H | 0.143012  | H | 0.138756  | H | 0.115488  |
| 24 | H | 0.133182  | N | -0.157781 | H | 0.138703  | H | 0.136341  | H | 0.132095  |
| 25 | H | 0.132255  | N | -0.058742 | N | -0.154744 | H | 0.136531  | H | 0.134573  |
| 26 | N | -0.128682 | C | -0.021020 | N | -0.056986 | N | -0.161838 | N | -0.112989 |
| 27 | N | -0.122575 | C | -0.122379 | C | -0.020894 | N | -0.088610 | N | -0.020947 |
| 28 | C | 0.040678  | C | -0.128560 | C | -0.131996 | C | 0.017059  | C | -0.036648 |
| 29 | C | -0.116009 | C | -0.059539 | C | -0.124189 | C | -0.117189 | C | -0.124894 |
| 30 | C | -0.125579 | H | 0.157376  | C | -0.062526 | C | -0.115530 | C | -0.122196 |
| 31 | C | -0.060595 | C | -0.073517 | H | 0.153036  | C | -0.053317 | C | -0.067526 |
| 32 | H | 0.149195  | H | 0.151367  | C | -0.072560 | H | 0.155751  | H | 0.155451  |
| 33 | C | -0.063025 | C | -0.113112 | H | 0.153985  | C | -0.060760 | C | -0.079860 |
| 34 | H | 0.148502  | H | 0.142252  | C | -0.114722 | H | 0.150113  | H | 0.153359  |
| 35 | C | -0.122292 | C | -0.166251 | H | 0.142080  | C | -0.116675 | C | -0.118168 |
| 36 | H | 0.134839  | H | 0.092987  | C | -0.166498 | H | 0.139821  | H | 0.137202  |
| 37 | C | -0.172273 | H | 0.087517  | H | 0.092123  | C | -0.174123 | C | -0.165031 |
| 38 | H | 0.087977  | H | 0.082079  | H | 0.087624  | H | 0.091470  | H | 0.089150  |
| 39 | H | 0.085099  | C | -0.166804 | H | 0.084499  | H | 0.087936  | H | 0.083300  |
| 40 | H | 0.085725  | H | 0.091622  | C | -0.167117 | H | 0.086898  | H | 0.082718  |
| 41 | C | -0.172439 | H | 0.091067  | H | 0.087629  | C | -0.175399 | C | -0.164851 |
| 42 | H | 0.089635  | H | 0.086032  | H | 0.090620  | H | 0.092406  | H | 0.088324  |
| 43 | H | 0.087851  | C | -0.048626 | H | 0.087727  | H | 0.092255  | H | 0.087663  |
| 44 | H | 0.082039  | C | -0.120181 | C | -0.058787 | H | 0.087500  | H | 0.081853  |
| 45 | C | 0.019898  | O | -0.068699 | C | -0.116327 | C | -0.012722 | C | -0.050848 |
| 46 | C | -0.174364 | C | -0.211402 | O | -0.041232 | C | -0.107090 | C | -0.142668 |
| 47 | O | -0.069300 | H | 0.193899  | C | -0.219953 | O | -0.079810 | O | -0.053385 |
| 48 | C | -0.202711 | C | -0.025279 | H | 0.186393  | C | -0.196283 | C | -0.222024 |
| 49 | H | 0.165015  | H | 0.168353  | C | -0.008718 | H | 0.174637  | H | 0.187906  |

---

---

|    |   |           |    |           |    |           |    |           |    |           |
|----|---|-----------|----|-----------|----|-----------|----|-----------|----|-----------|
| 50 | C | -0.079301 | H  | 0.198518  | H  | 0.165033  | C  | -0.036437 | C  | -0.012067 |
| 51 | H | 0.159898  | Zn | 0.491535  | H  | 0.201547  | H  | 0.172689  | H  | 0.159068  |
| 52 |   |           | Zn | 0.452374  | H  | 0.121149  | H  | 0.208729  | H  | 0.199529  |
| 53 |   |           | O  | -0.651078 | Zn | 0.573345  | Zn | 0.604153  | Zn | 0.654963  |
| 54 |   |           | O  | -0.626696 | Zn | 0.527833  | Zn | 0.581373  | Zn | 0.397150  |
| 55 |   |           |    |           | Zn | 0.526537  | Zn | 0.569357  | Zn | 0.555686  |
| 56 |   |           |    |           | O  | -0.672536 | Zn | 0.579639  | Zn | 0.569624  |
| 57 |   |           |    |           | O  | -0.672348 | O  | -0.728685 | O  | -0.618268 |
| 58 |   |           |    |           | O  | -0.618156 | O  | -0.721883 | O  | -0.488531 |
| 59 |   |           |    |           |    |           | O  | -0.637002 | O  | -0.643044 |
| 60 |   |           |    |           |    |           | O  | -0.649077 | O  | -0.612475 |

---

**Table S2.** Mulliken atomic charges of imidazole–Zn<sub>n</sub>O<sub>n</sub> clusters (n = 5-9)

| S. No. | Imidazole-Zn <sub>5</sub> O <sub>5</sub> |                | Imidazole-Zn <sub>6</sub> O <sub>6</sub> (R) |                | Imidazole-Zn <sub>6</sub> O <sub>6</sub> (C) |                | Imidazole-Zn <sub>7</sub> O <sub>7</sub> |                | Imidazole-Zn <sub>8</sub> O <sub>8</sub> |                | Imidazole-Zn <sub>9</sub> O <sub>9</sub> |                |
|--------|------------------------------------------|----------------|----------------------------------------------|----------------|----------------------------------------------|----------------|------------------------------------------|----------------|------------------------------------------|----------------|------------------------------------------|----------------|
|        | Atoms                                    | Atomic charges | Atoms                                        | Atomic charges | Atoms                                        | Atomic charges | Atoms                                    | Atomic charges | Atoms                                    | Atomic charges | Atoms                                    | Atomic charges |
| 1      | C                                        | 0.215899       | C                                            | 0.202298       | C                                            | 0.197438       | C                                        | 0.214651       | C                                        | 0.154743       | C                                        | 0.159144       |
| 2      | C                                        | 0.265311       | C                                            | 0.260134       | C                                            | 0.216178       | C                                        | 0.262689       | C                                        | 0.274270       | C                                        | 0.322534       |
| 3      | C                                        | 0.502270       | C                                            | 0.484396       | C                                            | 0.508376       | C                                        | 0.490263       | C                                        | 0.410593       | C                                        | 0.474476       |
| 4      | C                                        | 0.155269       | C                                            | 0.211224       | C                                            | 0.275701       | C                                        | 0.219269       | C                                        | 0.251748       | C                                        | 0.243441       |
| 5      | C                                        | -0.295349      | C                                            | -0.298039      | C                                            | -0.508954      | C                                        | -0.301495      | C                                        | -0.283859      | C                                        | -0.284677      |
| 6      | C                                        | -0.034249      | C                                            | -0.031317      | C                                            | -0.184342      | C                                        | -0.042826      | C                                        | -0.412372      | C                                        | -0.233464      |
| 7      | C                                        | -0.272960      | C                                            | -0.267472      | C                                            | -0.242810      | C                                        | -0.267382      | C                                        | -0.307915      | C                                        | -0.281969      |
| 8      | H                                        | 0.220692       | H                                            | 0.236455       | H                                            | 0.431581       | H                                        | 0.239399       | H                                        | 0.221097       | H                                        | 0.250712       |
| 9      | C                                        | -0.245651      | C                                            | -0.213675      | C                                            | -0.268388      | C                                        | -0.216757      | C                                        | -0.193617      | C                                        | -0.219932      |
| 10     | H                                        | 0.230020       | H                                            | 0.101740       | H                                            | 0.132969       | H                                        | 0.099939       | H                                        | 0.411072       | H                                        | 0.507525       |
| 11     | C                                        | -0.260955      | C                                            | -0.267762      | C                                            | -0.226495      | C                                        | -0.274572      | C                                        | -0.262474      | C                                        | -0.254411      |
| 12     | H                                        | 0.208455       | H                                            | 0.215449       | H                                            | 0.209864       | H                                        | 0.216894       | H                                        | 0.207959       | H                                        | 0.231851       |
| 13     | H                                        | 0.113166       | H                                            | 0.148040       | H                                            | 0.229936       | H                                        | 0.160011       | H                                        | 0.203141       | H                                        | 0.171895       |
| 14     | H                                        | 0.211462       | H                                            | 0.217141       | H                                            | 0.219709       | H                                        | 0.219660       | H                                        | 0.214690       | H                                        | 0.230768       |
| 15     | C                                        | 0.166322       | C                                            | 0.200233       | C                                            | 0.221941       | C                                        | 0.204836       | C                                        | 0.212051       | C                                        | 0.191882       |
| 16     | C                                        | -0.371447      | C                                            | -0.377842      | C                                            | -0.497089      | C                                        | -0.384872      | C                                        | -0.367561      | C                                        | -0.345943      |
| 17     | C                                        | -0.249368      | C                                            | -0.258674      | C                                            | -0.264039      | C                                        | -0.257423      | C                                        | -0.269859      | C                                        | -0.265025      |
| 18     | C                                        | -0.209118      | C                                            | -0.228449      | C                                            | -0.236336      | C                                        | -0.228566      | C                                        | -0.233717      | C                                        | -0.245319      |
| 19     | H                                        | 0.246788       | H                                            | 0.260089       | H                                            | 0.425145       | H                                        | 0.264449       | H                                        | 0.261452       | H                                        | 0.253325       |
| 20     | C                                        | -0.246946      | C                                            | -0.244617      | C                                            | -0.262263      | C                                        | -0.248670      | C                                        | -0.250155      | C                                        | -0.253660      |
| 21     | H                                        | 0.223615       | H                                            | 0.230544       | H                                            | 0.251833       | H                                        | 0.230419       | H                                        | 0.228686       | H                                        | 0.237285       |
| 22     | C                                        | -0.222834      | C                                            | -0.221009      | C                                            | -0.223245      | C                                        | -0.219418      | C                                        | -0.220987      | C                                        | -0.220792      |

---

|    |   |           |   |           |   |           |   |           |   |           |   |           |
|----|---|-----------|---|-----------|---|-----------|---|-----------|---|-----------|---|-----------|
| 23 | H | 0.214037  | H | 0.220539  | H | 0.211777  | H | 0.219879  | H | 0.215180  | H | 0.226756  |
| 24 | H | 0.213747  | H | 0.215179  | H | 0.219085  | H | 0.215675  | H | 0.213895  | H | 0.222188  |
| 25 | H | 0.218835  | H | 0.220593  | H | 0.218516  | H | 0.220623  | H | 0.214923  | H | 0.226175  |
| 26 | N | -0.731041 | N | -0.740330 | N | -0.767574 | N | -0.745901 | N | -0.688924 | N | -0.741024 |
| 27 | N | -0.611511 | N | -0.592969 | N | -0.535823 | N | -0.590665 | N | -0.541073 | N | -0.555084 |
| 28 | C | 0.313133  | C | 0.307673  | C | 0.311856  | C | 0.305113  | C | 0.323775  | C | 0.324514  |
| 29 | C | -0.372330 | C | -0.378471 | C | -0.355091 | C | -0.374010 | C | -0.354570 | C | -0.360195 |
| 30 | C | -0.447409 | C | -0.466652 | C | -0.610265 | C | -0.470596 | C | -0.493646 | C | -0.493761 |
| 31 | C | 0.317964  | C | 0.309525  | C | 0.303092  | C | 0.306068  | C | 0.323737  | C | 0.318518  |
| 32 | H | 0.238490  | H | 0.246340  | H | 0.277809  | H | 0.247209  | H | 0.239290  | H | 0.242436  |
| 33 | C | 0.336295  | C | 0.346107  | C | 0.369940  | C | 0.343766  | C | 0.356716  | C | 0.359412  |
| 34 | H | 0.261091  | H | 0.269123  | H | 0.319581  | H | 0.267629  | H | 0.257945  | H | 0.261135  |
| 35 | C | -0.470147 | C | -0.469092 | C | -0.472770 | C | -0.466943 | C | -0.479925 | C | -0.468408 |
| 36 | H | 0.229068  | H | 0.231721  | H | 0.233552  | H | 0.232478  | H | 0.229673  | H | 0.230580  |
| 37 | C | -0.628043 | C | -0.625556 | C | -0.637946 | C | -0.625292 | C | -0.642744 | C | -0.631805 |
| 38 | H | 0.199666  | H | 0.201307  | H | 0.210003  | H | 0.201676  | H | 0.199123  | H | 0.198510  |
| 39 | H | 0.185296  | H | 0.185428  | H | 0.188156  | H | 0.185018  | H | 0.183187  | H | 0.185775  |
| 40 | H | 0.187342  | H | 0.186653  | H | 0.180641  | H | 0.186939  | H | 0.180698  | H | 0.181651  |
| 41 | C | -0.632951 | C | -0.630142 | C | -0.630103 | C | -0.630465 | C | -0.639124 | C | -0.633548 |
| 42 | H | 0.204515  | H | 0.206051  | H | 0.203409  | H | 0.206297  | H | 0.201826  | H | 0.202540  |
| 43 | H | 0.189713  | H | 0.190390  | H | 0.196724  | H | 0.191485  | H | 0.192762  | H | 0.194045  |
| 44 | H | 0.185389  | H | 0.186298  | H | 0.187441  | H | 0.186240  | H | 0.182006  | H | 0.185129  |
| 45 | C | 0.282959  | C | 0.297116  | C | 0.229517  | C | 0.291684  | C | 0.355055  | C | 0.248057  |
| 46 | C | -0.222427 | C | -0.202391 | C | -0.045733 | C | -0.191737 | C | -0.203574 | C | -0.176400 |
| 47 | O | -0.466524 | O | -0.504479 | O | -0.535881 | O | -0.517761 | O | -0.530497 | O | -0.520222 |
| 48 | C | -0.316891 | C | -0.293339 | C | -0.324549 | C | -0.293713 | C | -0.275428 | C | -0.286529 |
| 49 | H | 0.272528  | H | 0.271532  | H | 0.212054  | H | 0.272619  | H | 0.271414  | H | 0.280646  |

---

|    |    |           |    |           |    |           |    |           |    |           |    |           |
|----|----|-----------|----|-----------|----|-----------|----|-----------|----|-----------|----|-----------|
| 50 | C  | 0.054107  | C  | 0.027085  | C  | 0.032698  | C  | 0.030346  | C  | -0.027046 | C  | 0.046740  |
| 51 | H  | 0.245117  | H  | 0.249454  | H  | 0.247757  | H  | 0.248718  | H  | 0.241574  | H  | 0.255332  |
| 52 | H  | 0.264645  | H  | 0.260371  | H  | 0.260829  | H  | 0.257644  | H  | 0.263303  | H  | 0.265945  |
| 53 | Zn | 1.274016  | Zn | 1.232666  | Zn | 1.273945  | Zn | 1.236659  | Zn | 0.998877  | Zn | 1.153242  |
| 54 | Zn | 1.046884  | Zn | 0.968407  | O  | -1.080970 | Zn | 1.009533  | Zn | 1.079898  | Zn | 0.526775  |
| 55 | Zn | 1.023506  | Zn | 1.020784  | O  | -1.274665 | Zn | 1.002989  | Zn | 1.087440  | Zn | 0.825913  |
| 56 | Zn | 1.027888  | Zn | 1.022683  | O  | -1.048246 | Zn | 1.024237  | Zn | 1.097221  | Zn | 0.989933  |
| 57 | Zn | 0.998959  | O  | -1.072871 | Zn | 1.192262  | O  | -1.083846 | Zn | 1.109634  | Zn | 1.054232  |
| 58 | O  | -1.149090 | O  | -1.062368 | Zn | 0.898472  | O  | -1.065071 | Zn | 1.081871  | Zn | 1.138587  |
| 59 | O  | -1.062006 | O  | -1.097030 | Zn | 1.189188  | O  | -1.087889 | Zn | 1.030178  | Zn | 1.140991  |
| 60 | O  | -1.035414 | O  | -1.092610 | Zn | 0.904094  | O  | -1.095215 | Zn | 1.289733  | Zn | 1.042693  |
| 61 | O  | -1.092543 | O  | -1.043988 | Zn | 1.104771  | O  | -0.990064 | O  | -1.017328 | Zn | 1.001881  |
| 62 | O  | -1.097255 | O  | -1.049046 | O  | -1.236096 | Zn | 0.984519  | O  | -1.158005 | O  | -0.551415 |
| 63 |    |           | Zn | 1.024570  | O  | -1.032469 | Zn | 1.038209  | O  | -1.096299 | O  | -1.119396 |
| 64 |    |           | Zn | 1.064849  | O  | -0.995699 | Zn | 1.036524  | O  | -1.102580 | O  | -1.078114 |
| 65 |    |           |    |           |    |           | O  | -1.044973 | O  | -1.109153 | O  | -1.065553 |
| 66 |    |           |    |           |    |           | O  | -1.056134 | O  | -1.106610 | O  | -1.083212 |
| 67 |    |           |    |           |    |           |    |           | O  | -1.091267 | O  | -1.152179 |
| 68 |    |           |    |           |    |           |    |           | O  | -1.112124 | O  | -1.108029 |
| 69 |    |           |    |           |    |           |    |           |    |           | O  | -1.103000 |
| 70 |    |           |    |           |    |           |    |           |    |           | O  | -1.072102 |
