# Supplementary figures and images for: Understanding the binding interaction of imidazole with ZnO nanomaterials and clusters
Source: Royal Society of Chemistry journal article supplement (doi:10.1039/c4ra15957h), 2014-12-22

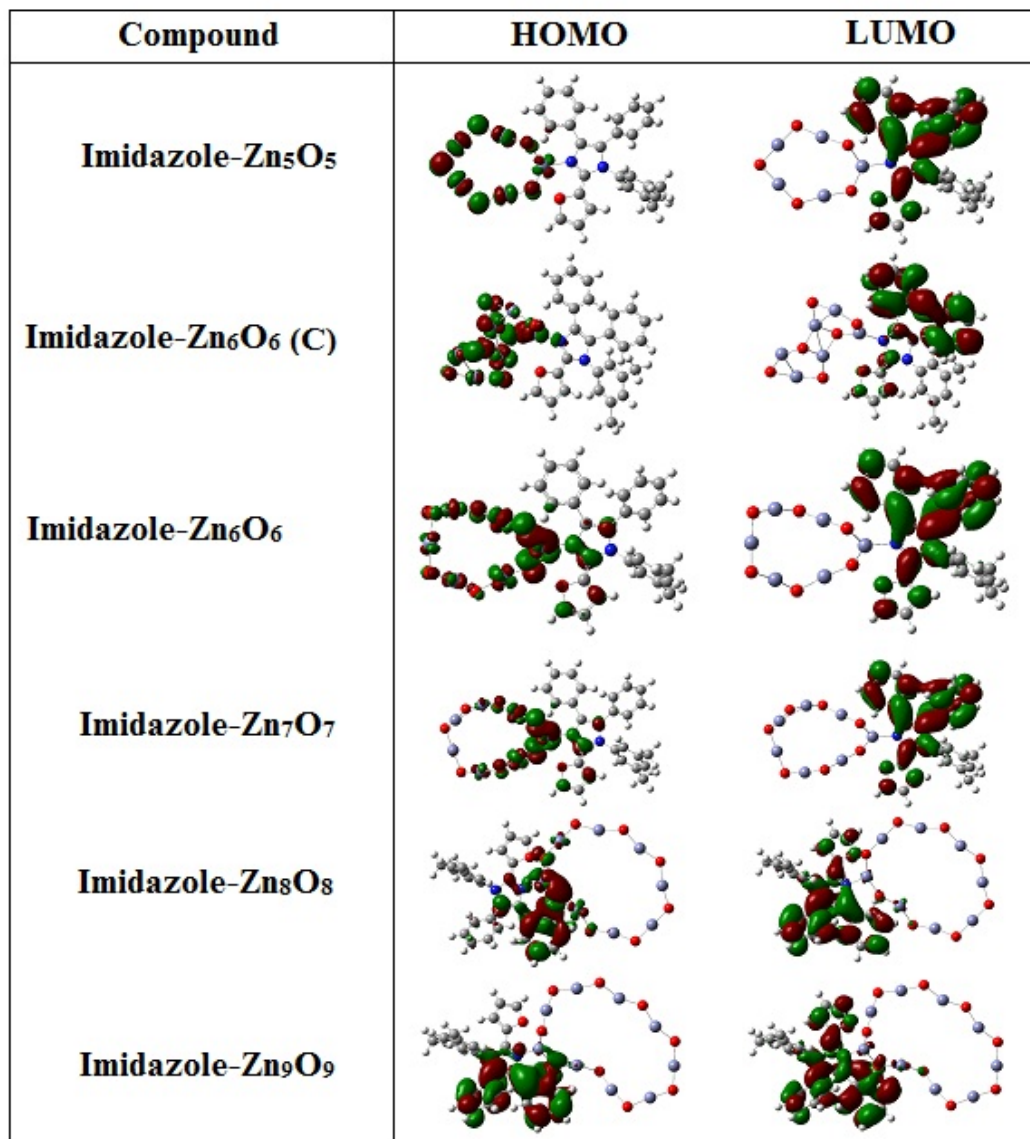

Figure S1c

Supplement: c4ra15957h3.pdf [file c4ra15957h3.pdf]

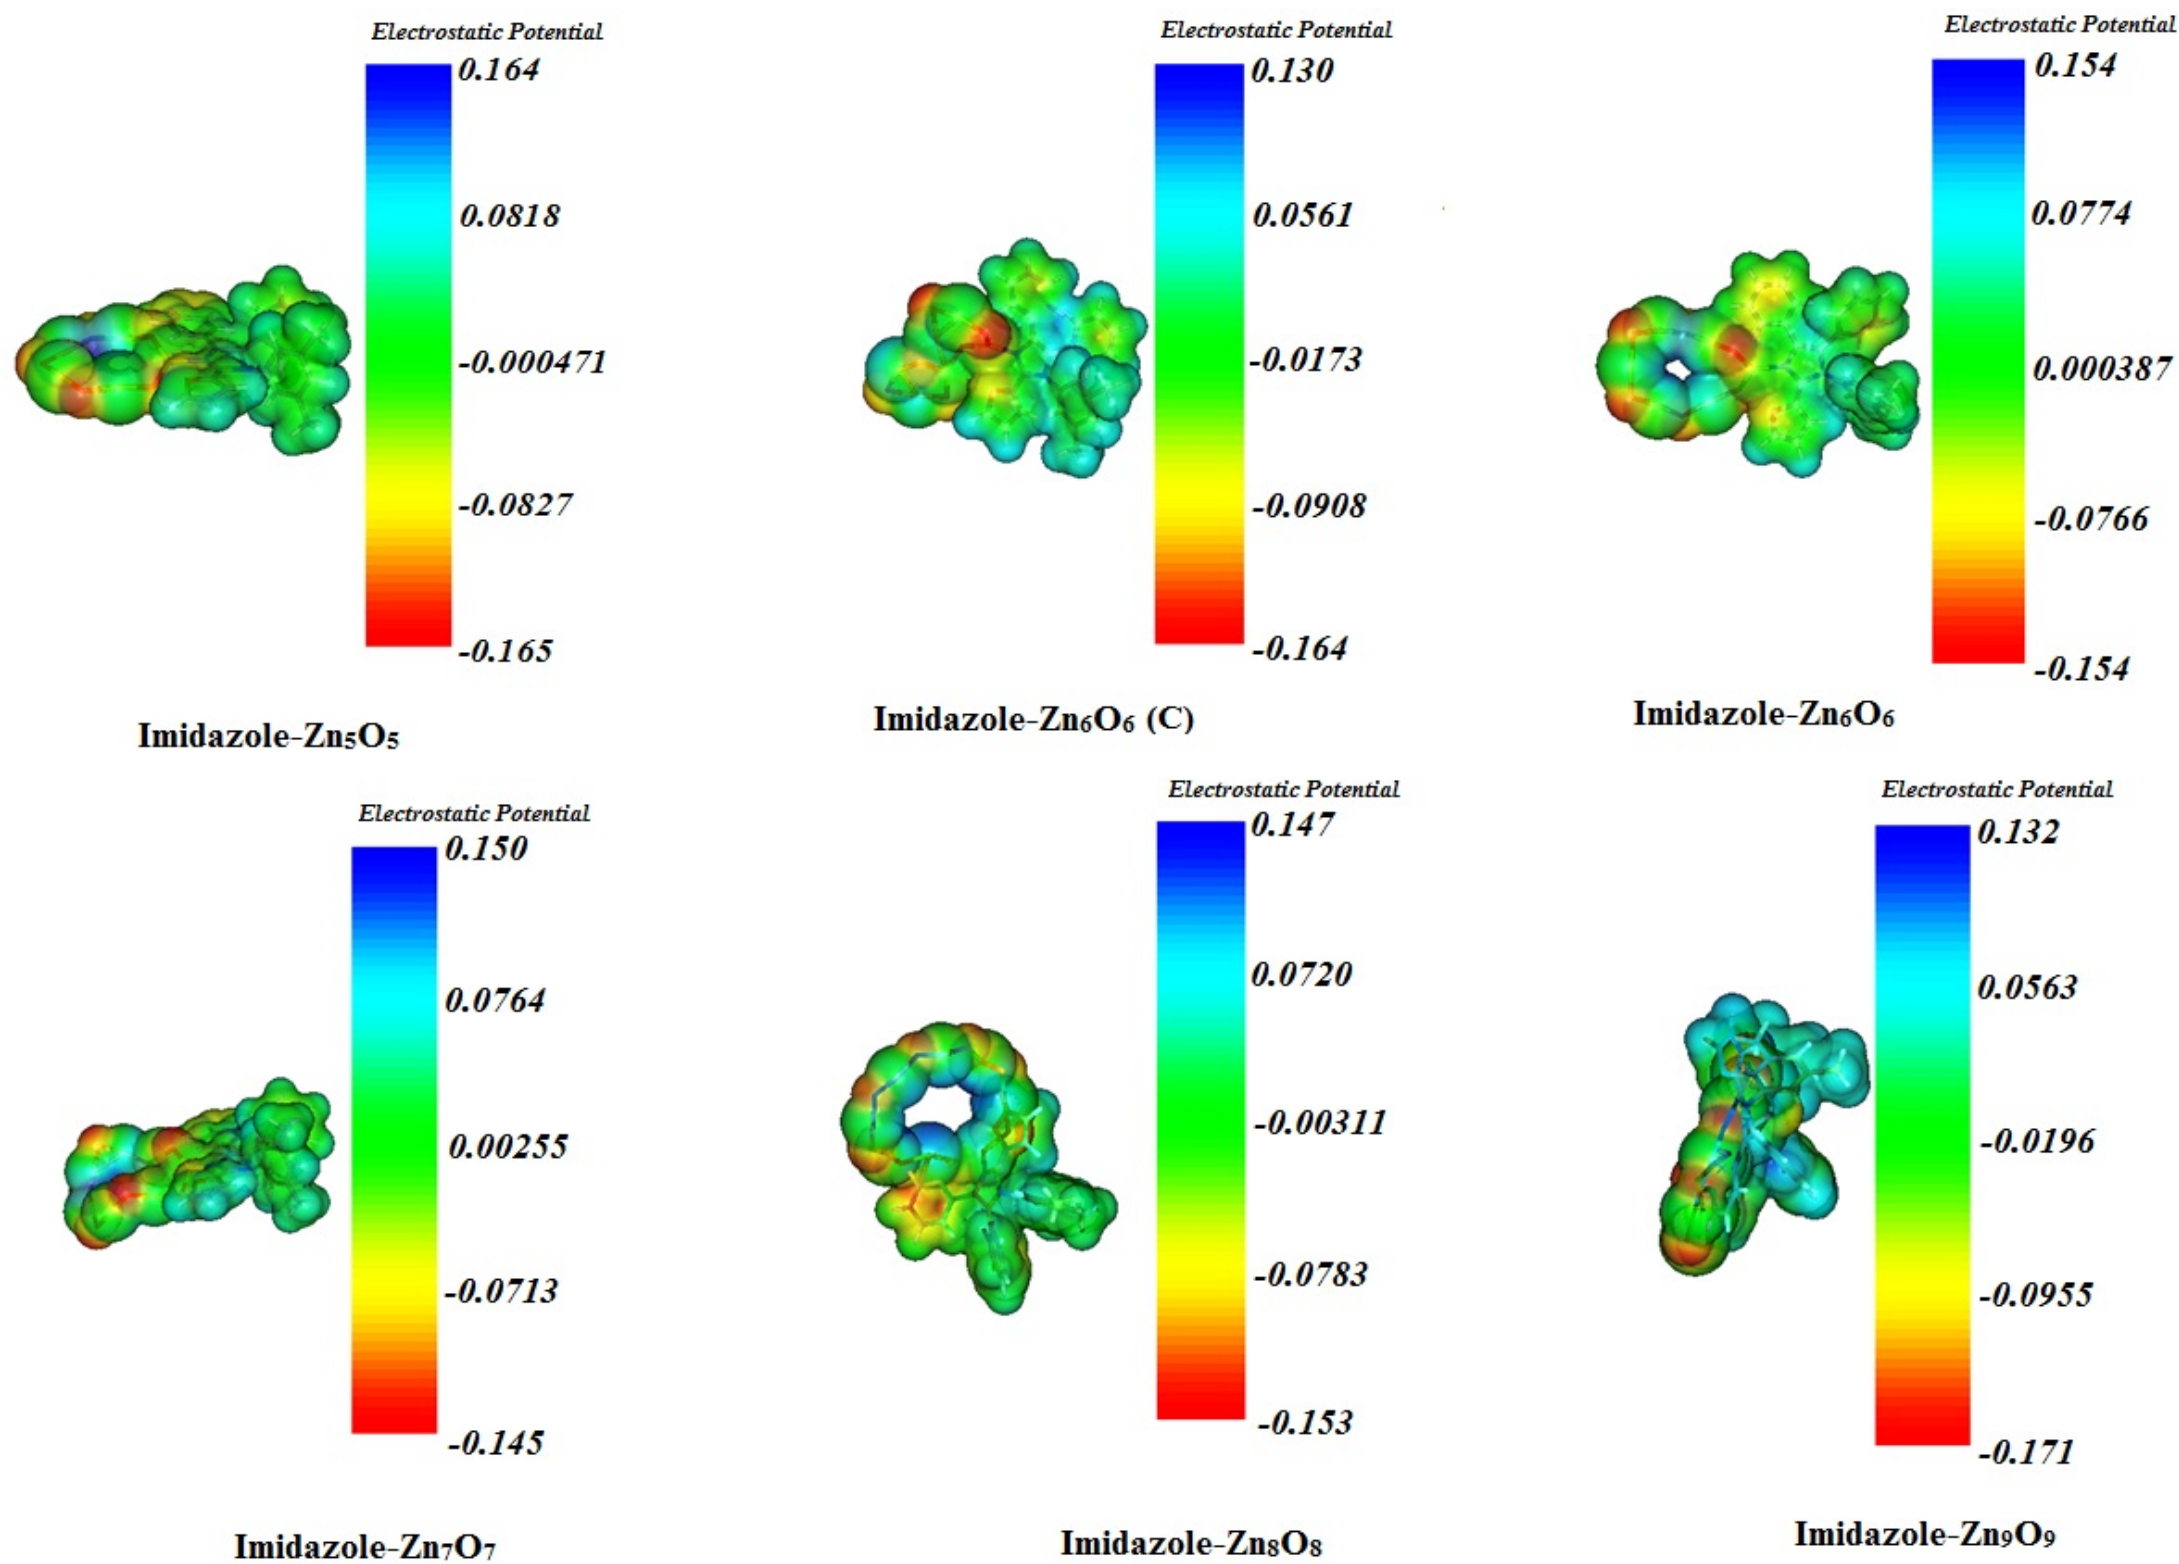

Figure S2a

Supplement: c4ra15957h4.pdf [file c4ra15957h4.pdf]

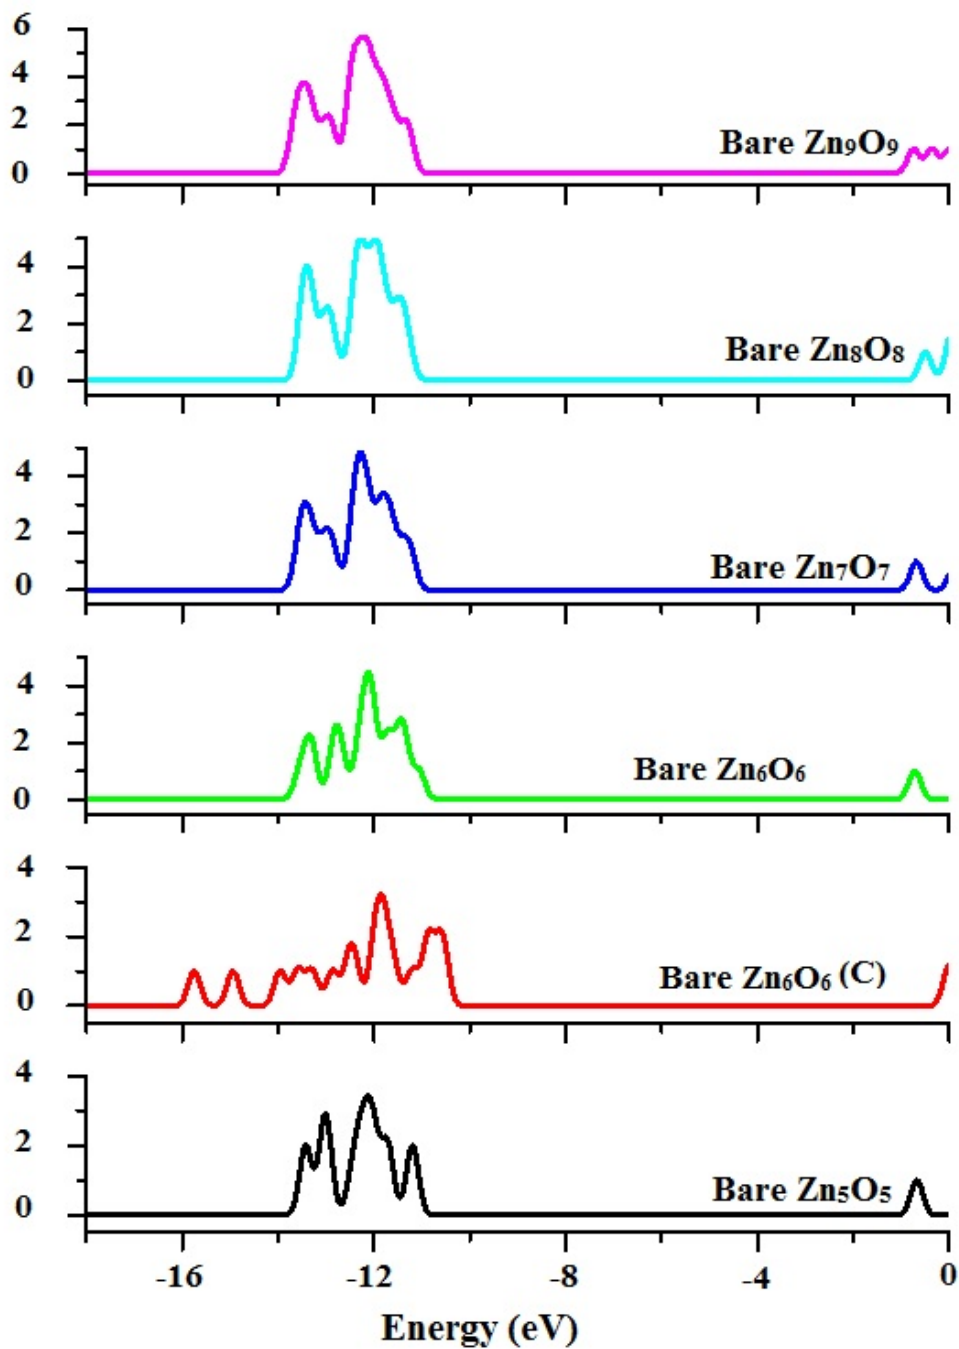

**Figure S2b**

Supplement: c4ra15957h5.pdf [file c4ra15957h5.pdf]

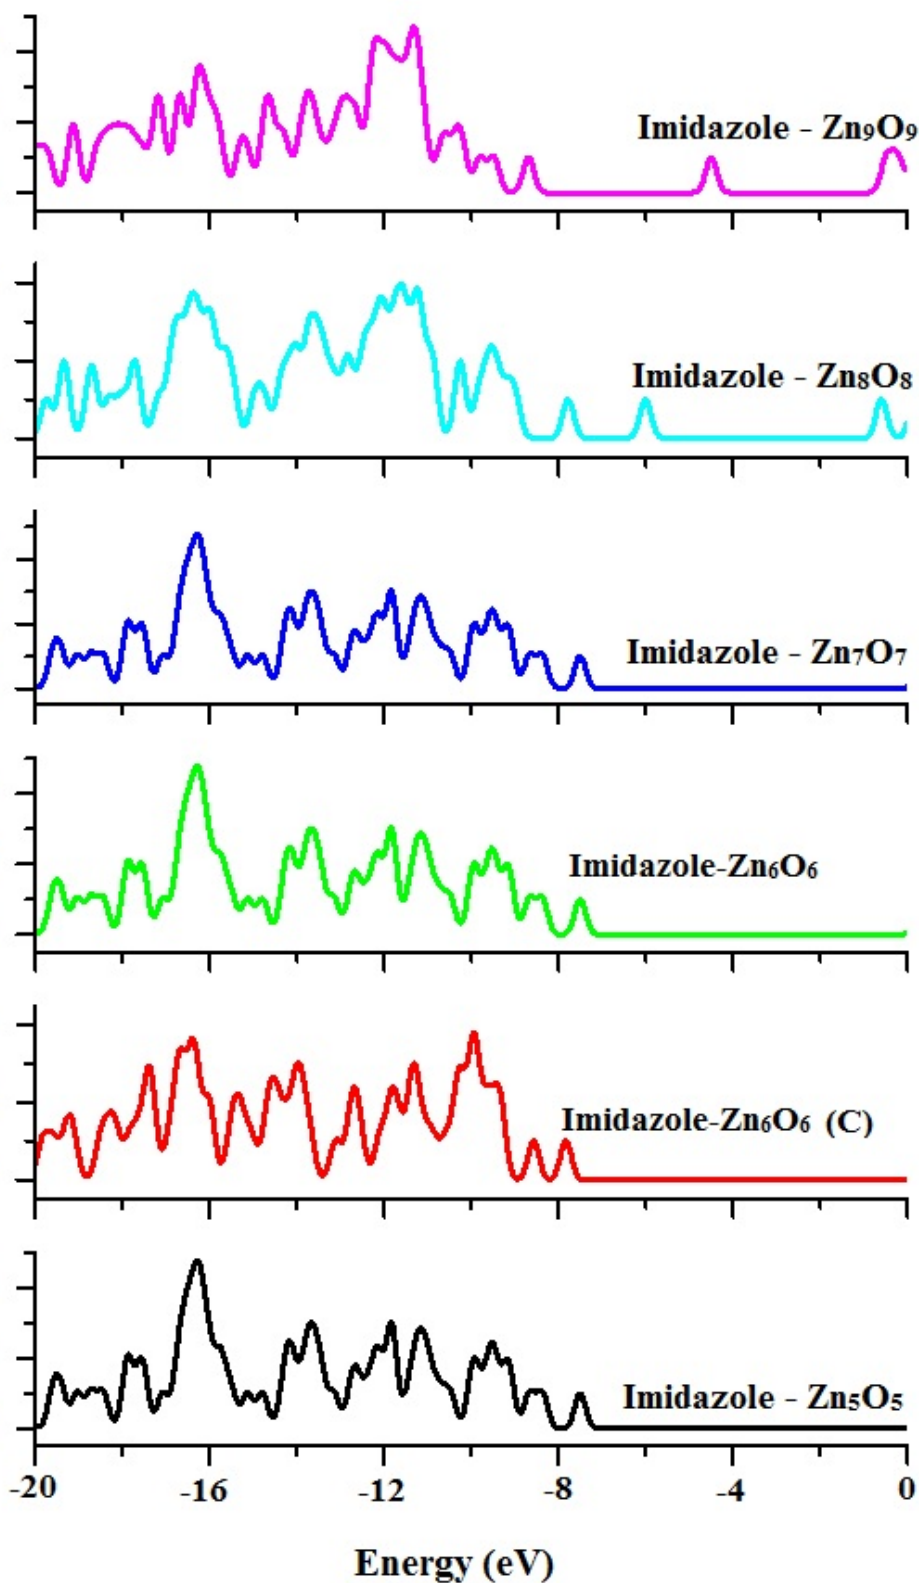

**Figure S2c**

Supplement: c4ra15957h6.pdf [file c4ra15957h6.pdf]
